# Supplementary material for: Influence of polymer chemistry on crystal growth inhibition of two chemically diverse organic molecules
Source: Royal Society of Chemistry journal article supplement (doi:10.1039/c1ce05822c), 2011-01-01
Supplement: c1ce05822c.pdf [file c1ce05822c.pdf]

## Supporting data

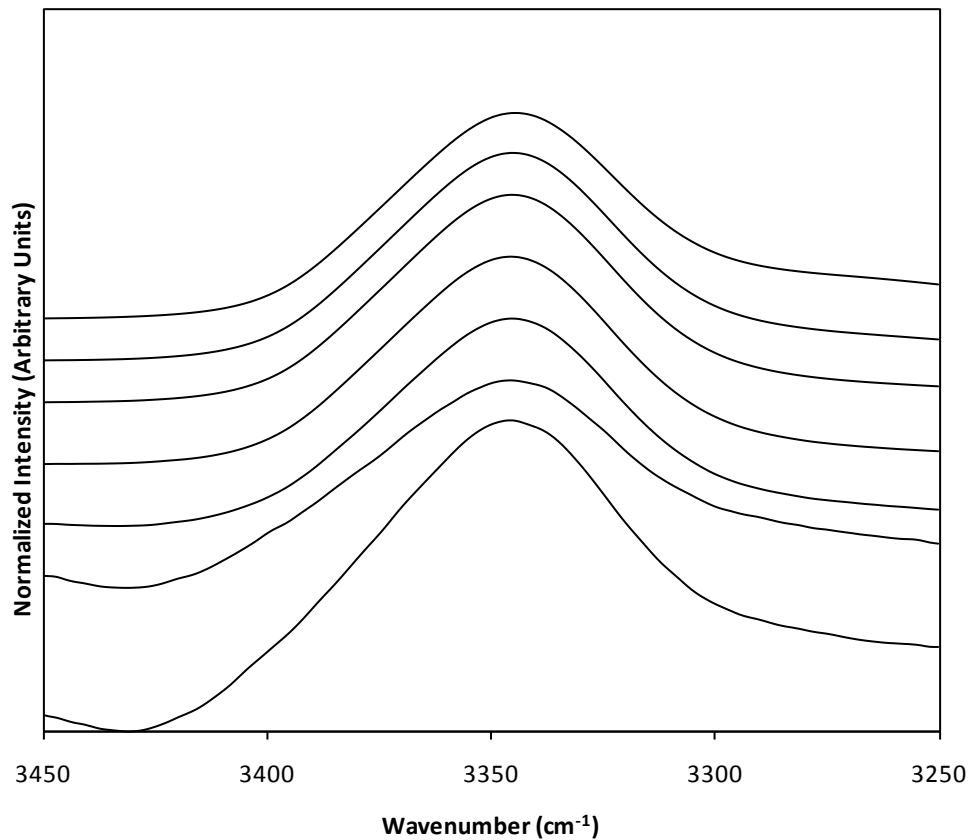

**Figure S 1:** NH peak position of nimesulide as a function of solution concentration ( 1, 2.5, 5, 10, 25, 50, 100 mg/ml in dichloromethane– bottom to top).

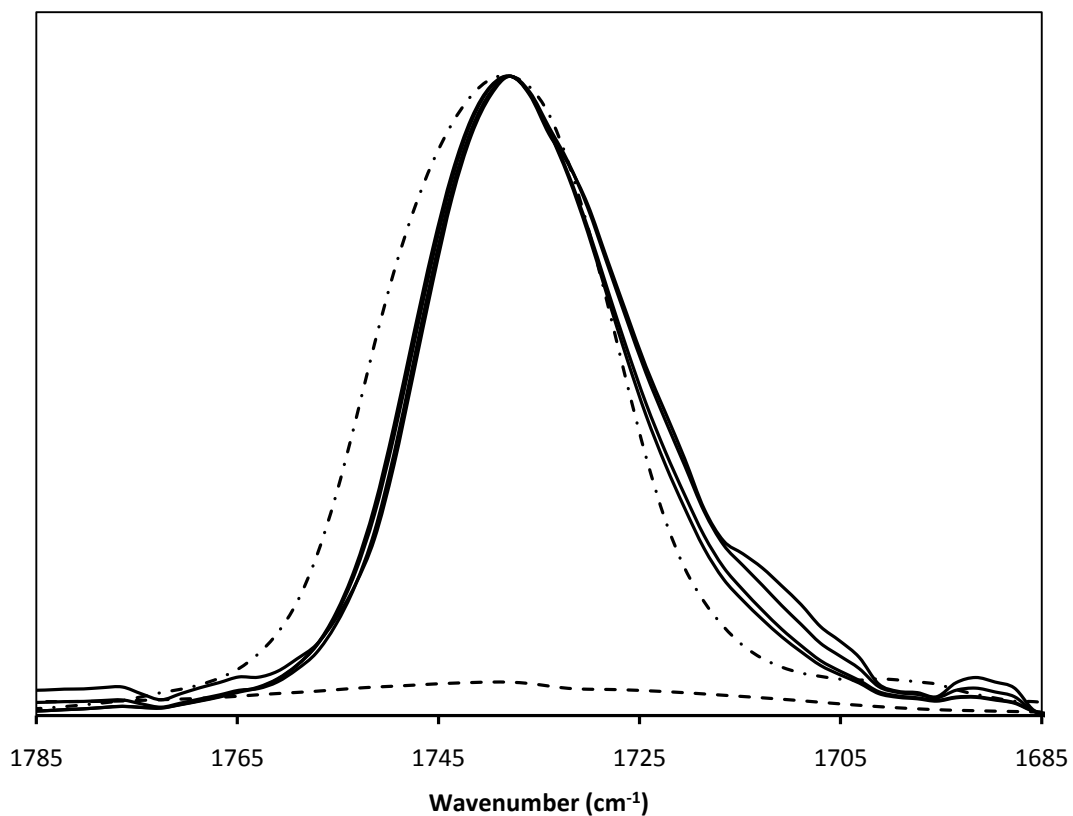

Figure S 2: IR spectra showing acetate region of pure PVAc ( dash dotted lines) and PVAc – Nimesulide systems containing 20, 30, 40 and 50wt% polymer (solid lines from left to right). Dash lines at the bottom indicated the same wave number region for nimesulide.

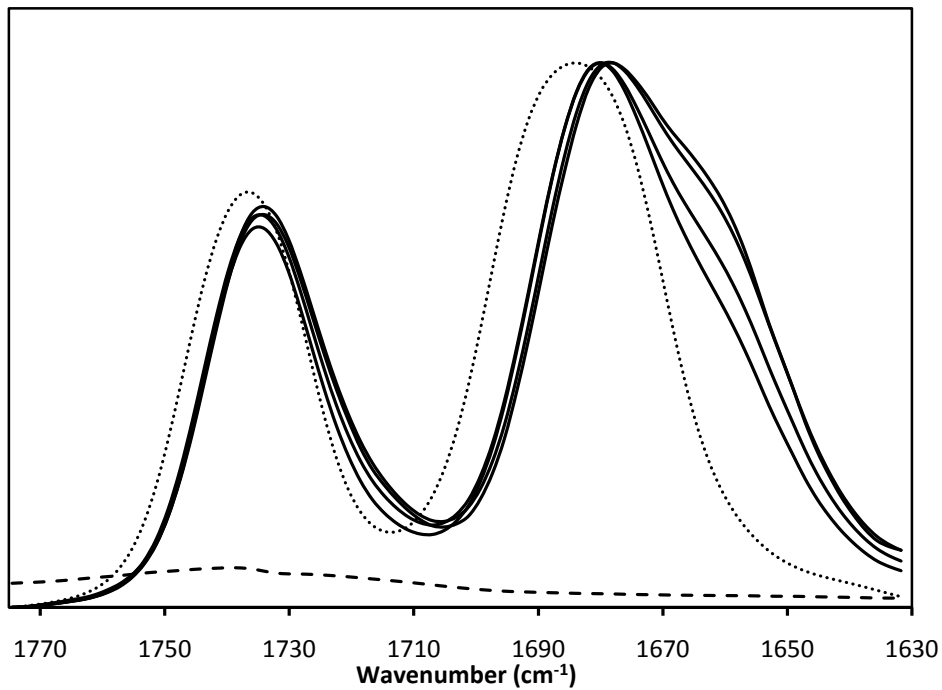

**Figure S 3:** IR spectra showing acetate(left) and carbonyl peaks (right) of pure PVP/VA ( dotted lines) and PVP/VA –Nimesulide systems containing 20, 30, 40 and 50wt% polymer (solid lines from left to right). Dash lines at the bottom indicated the same wave number region for nimesulide.

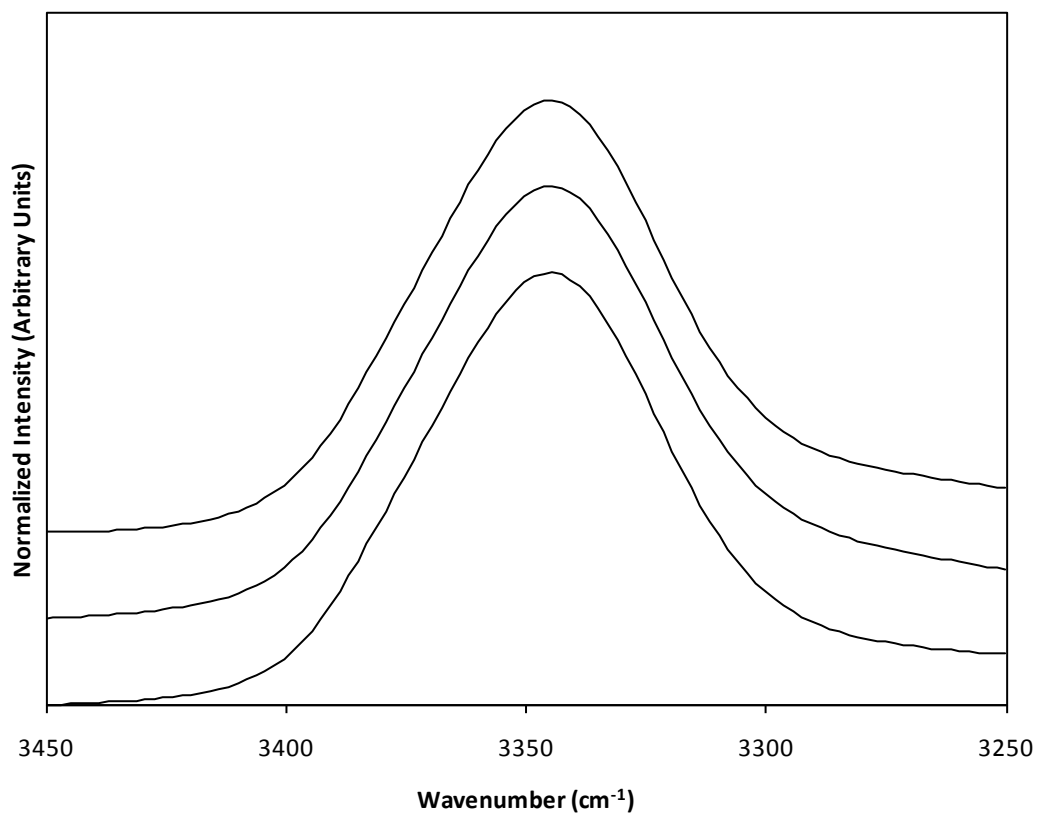

**Figure S 4:** NH peak position of nimesulide in dichloromethane solution (50 mg/ml) and the peak position (of 50 mg/ml dichloromethane solution) upon addition of acetic acid and 1-ethyl-2 pyrrolidone (1:1 molar ratio to nimesulide) – bottom to top.
